# Supplementary material
Source: PubMed Central journal article supplement (PMC5714293)

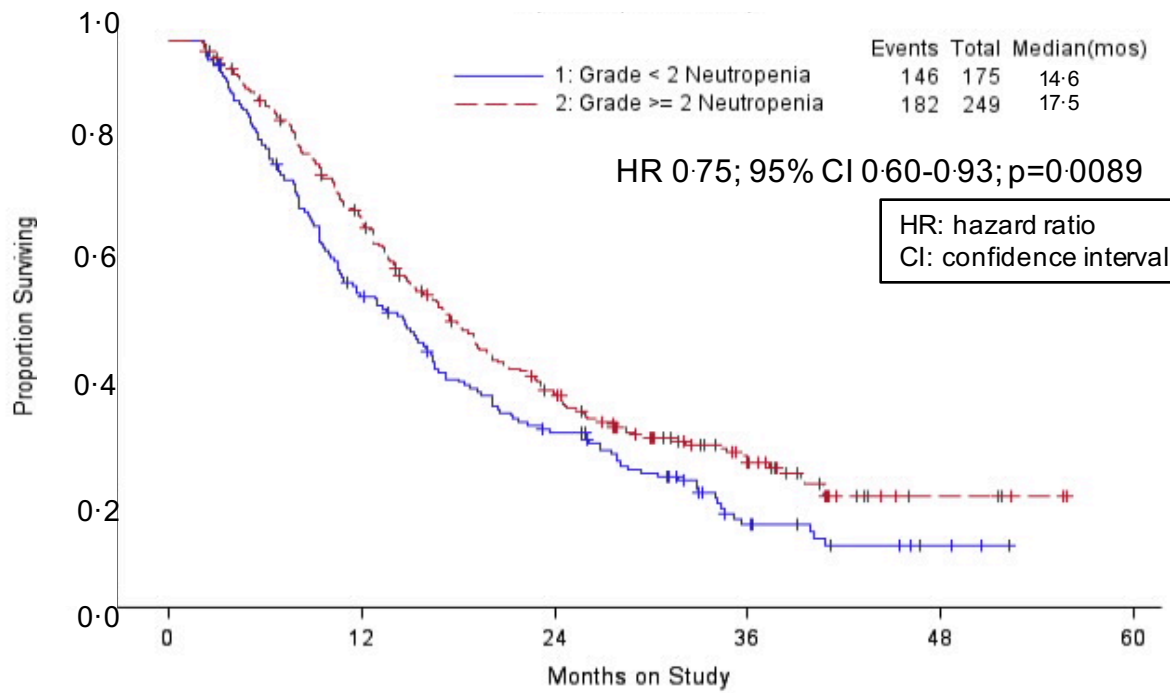

|   | 0   | 12  | 24 | 36 | 48 | 60 |
|---|-----|-----|----|----|----|----|
| 1 | 175 | 92  | 47 | 13 | 3  | 0  |
| 2 | 249 | 163 | 81 | 33 | 5  | 0  |

Supplement: NIHMS897429-supplement-2.pdf [file NIHMS897429-supplement-2.pdf]

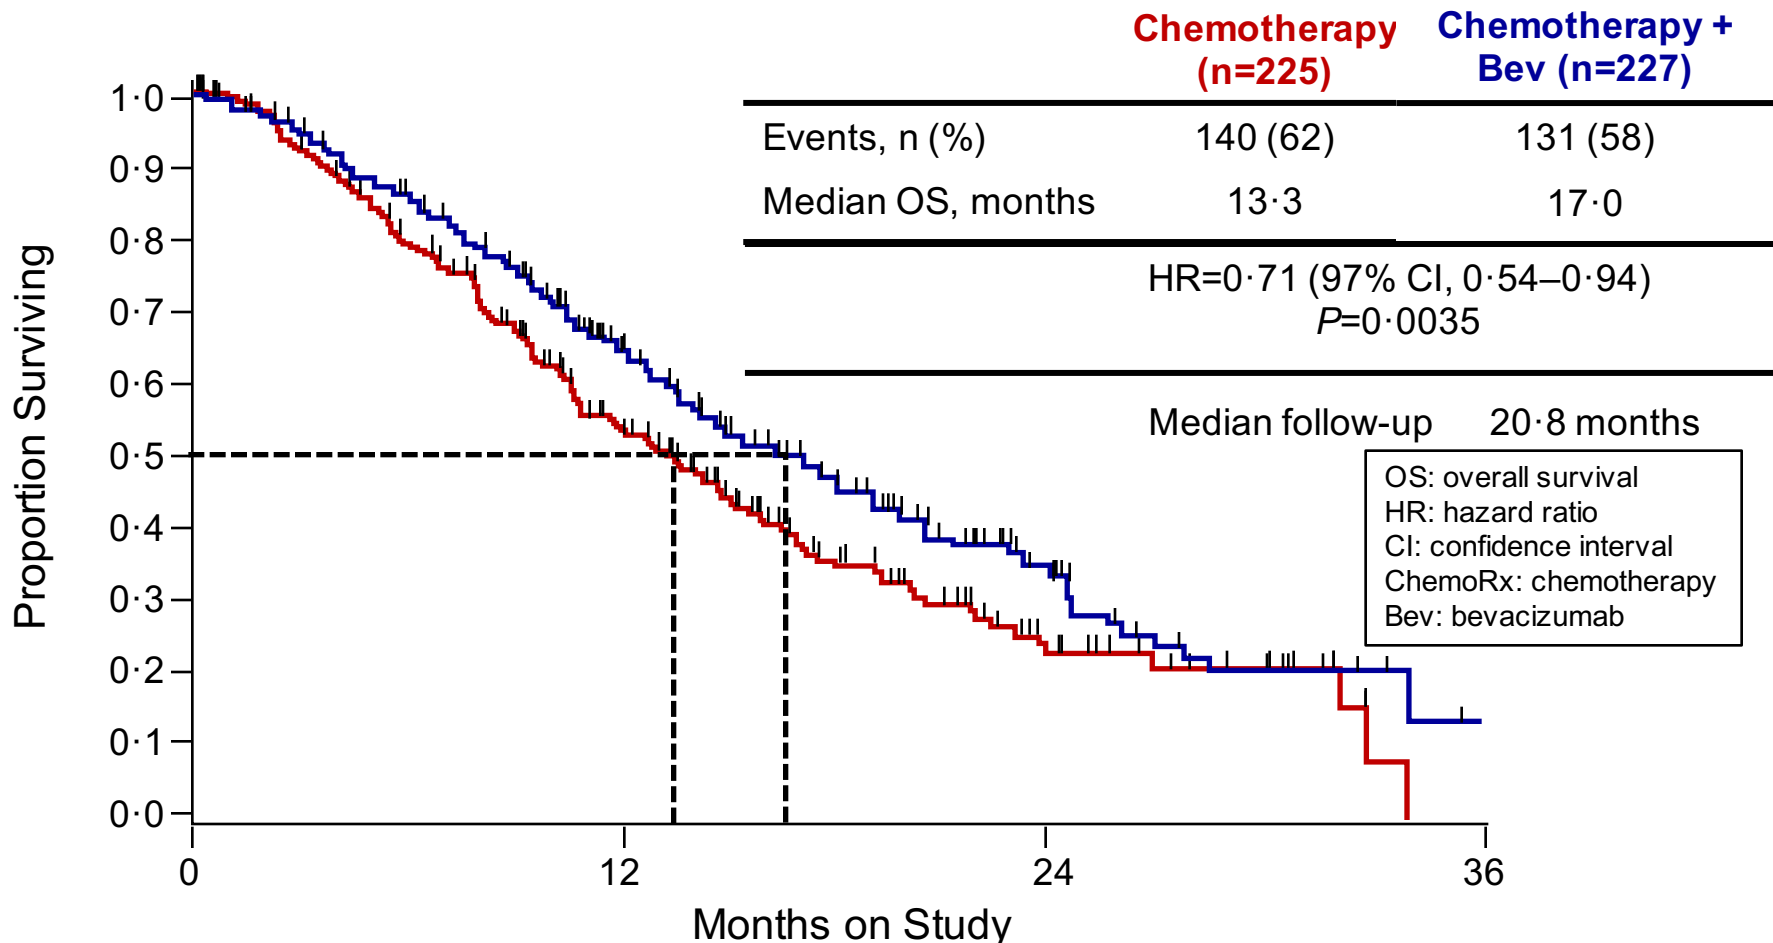

|               |     |     |     |    |    |    |
|---------------|-----|-----|-----|----|----|----|
| ChemoRx alone | 225 | 167 | 94  | 45 | 17 | 8  |
| ChemoRx + Bev | 227 | 184 | 121 | 69 | 30 | 10 |

Supplement: NIHMS897429-supplement-3.pdf [file NIHMS897429-supplement-3.pdf]

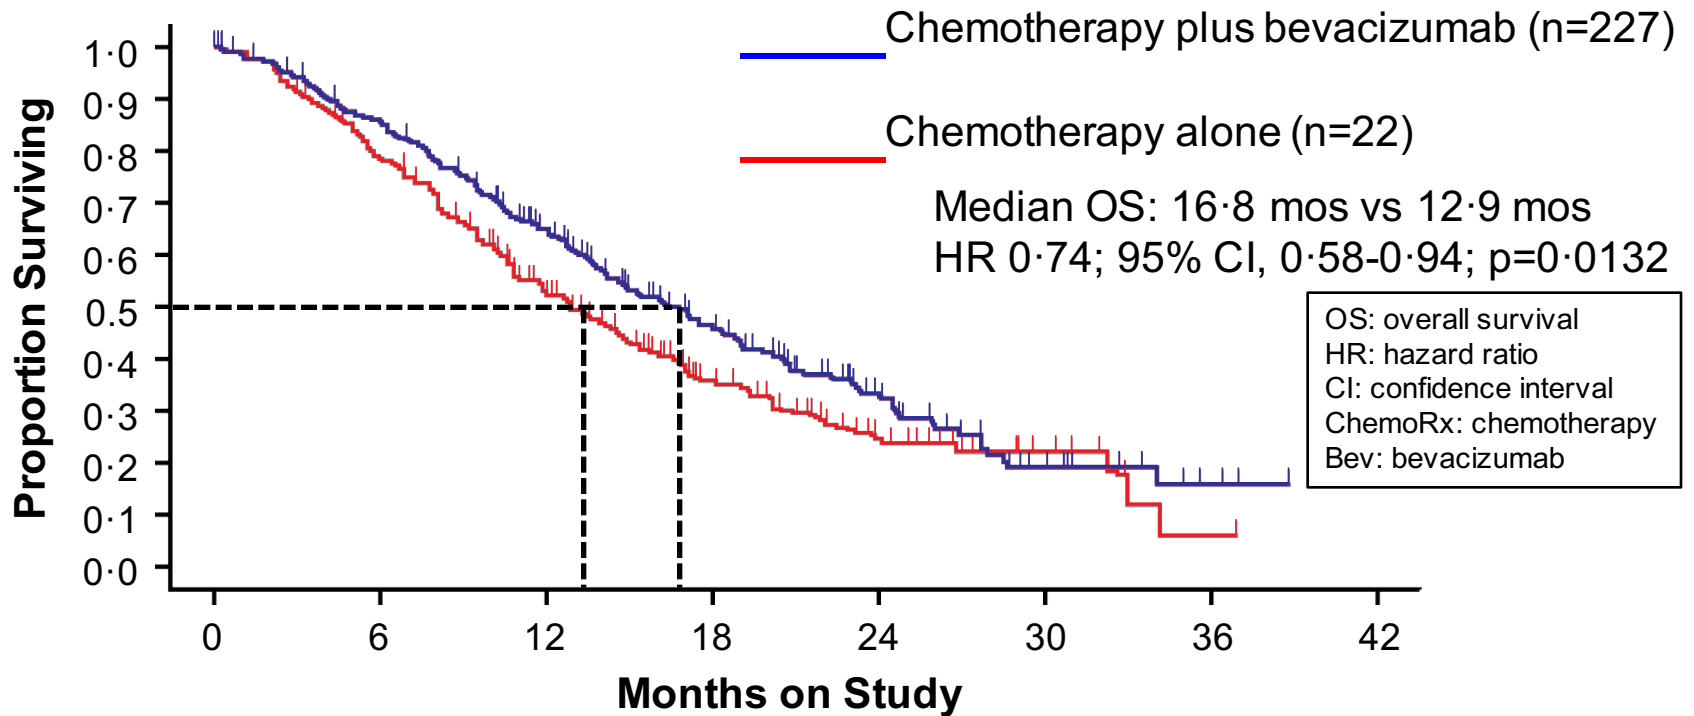

|               |     |     |     |    |    |    |
|---------------|-----|-----|-----|----|----|----|
| ChemoRx alone | 225 | 167 | 94  | 45 | 17 | 8  |
| ChemoRx + Bev | 227 | 184 | 121 | 69 | 30 | 10 |

Supplement: NIHMS897429-supplement-4.pdf [file NIHMS897429-supplement-4.pdf]
